# Supplementary material for: Virologic Response to Dolutegravir Plus Lamivudine in People With Suppressed Human Immunodeficiency Virus Type 1 and Historical M184V/I: A Systematic Literature Review and Meta-analysis
Source: PubMed Central journal article supplement — Open Forum Infect Dis. 2023 Oct 27;10(11):ofad526. doi: 10.1093/ofid/ofad526 (PMC10686367; doi:10.1093/ofid/ofad526), 2023-10-27

## ONLINE SUPPLEMENTARY MATERIAL

### **Virologic Response to Dolutegravir + Lamivudine in People With Suppressed HIV-1 and Historical M184V/I: A Meta-analysis**

Madhusudan Kabra,<sup>1\*</sup> Tristan J. Barber,<sup>2,3</sup> Clotilde Allavena,<sup>4</sup> Anne-Geneviève Marcelin,<sup>5</sup> Simona Di Giambenedetto,<sup>6</sup> Juan Pasquau,<sup>7</sup> Nicola Gianotti,<sup>8</sup> Josep M. Llibre,<sup>9</sup> David Rial-Crestelo,<sup>10,11</sup> Rosa De Miguel-Buckley,<sup>11,12</sup> Gary Blick,<sup>13</sup> Matthew Turner,<sup>14</sup> Cale Harrison,<sup>14</sup> Tammy Wynne,<sup>14</sup> Gustavo Verdier,<sup>15</sup> Chris M. Parry,<sup>1</sup> Bryn Jones,<sup>1</sup> Chinyere Okoli,<sup>1</sup> Cynthia Donovan,<sup>16</sup> Julie Priest,<sup>16</sup> Emilio Letang<sup>17</sup>

<sup>1</sup>ViiV Healthcare, Brentford, UK; <sup>2</sup>Ian Charleson Day Centre, Royal Free London NHS Foundation Trust, London, UK; <sup>3</sup>Institute for Global Health, University College London, London, UK; <sup>4</sup>CHU Hôtel-Dieu, Nantes, France; <sup>5</sup>Sorbonne Université, INSERM, Institut Pierre Louis d'Epidémiologie et de Santé Publique, AP-HP, Hôpital Pitié-Salpêtrière, Laboratoire de Virologie, F-75013, Paris, France; <sup>6</sup>Fondazione Policlinico Universitario Agostino Gemelli IRCCS and Università Cattolica del Sacro Cuore, Rome, Italy; <sup>7</sup>Virgen de las Nieves University Hospital, Granada, Spain; <sup>8</sup>IRCCS Ospedale San Raffaele, Milan, Italy; <sup>9</sup>Hospital Universitari Germans Trias i Pujol, Barcelona, Spain; <sup>10</sup>Hospital Universitario 12 de Octubre, Madrid, Spain; <sup>11</sup>Centro de Investigación Biomédica en Red de Enfermedades Infecciosas (CIBERINFEC), Madrid, Spain; <sup>12</sup>Hospital Universitario La Paz, Madrid, Spain; <sup>13</sup>Health Care Advocates International, Stratford, CT, USA; <sup>14</sup>HEOR Ltd, Cardiff, UK; <sup>15</sup>ViiV Healthcare, Montréal, QC, Canada; <sup>16</sup>ViiV Healthcare, Durham, NC, USA; <sup>17</sup>ViiV Healthcare, Madrid, Spain

\*Employee at the time of the analysis.

## TABLE OF CONTENTS

|                              |    |
|------------------------------|----|
| Supplementary Table 1 .....  | 3  |
| Supplementary Table 2 .....  | 6  |
| Supplementary Table 3 .....  | 8  |
| Supplementary Table 4 .....  | 9  |
| Supplementary Figure 1 ..... | 10 |
| Supplementary Figure 2 ..... | 11 |
| Supplementary Figure 3 ..... | 13 |
| Supplementary Figure 4 ..... | 15 |

**Supplementary Table 1.** Summary of Systematic Literature Search Strategy Criteria

| <b>Embase® and MEDLINE® database search criteria</b> |                                                                                                                                                                                                                                                                                                                                                                                                                                                                                                                                                                                                                                                                                                                                                                                                                                                                                                                                                                                                                                                                        |              |                   |
|------------------------------------------------------|------------------------------------------------------------------------------------------------------------------------------------------------------------------------------------------------------------------------------------------------------------------------------------------------------------------------------------------------------------------------------------------------------------------------------------------------------------------------------------------------------------------------------------------------------------------------------------------------------------------------------------------------------------------------------------------------------------------------------------------------------------------------------------------------------------------------------------------------------------------------------------------------------------------------------------------------------------------------------------------------------------------------------------------------------------------------|--------------|-------------------|
| <b>Number</b>                                        | <b>Query</b>                                                                                                                                                                                                                                                                                                                                                                                                                                                                                                                                                                                                                                                                                                                                                                                                                                                                                                                                                                                                                                                           | <b>Facet</b> | <b>Results, n</b> |
| 1                                                    | 'human immunodeficiency virus infection'/exp OR 'human immunodeficiency virus infection'                                                                                                                                                                                                                                                                                                                                                                                                                                                                                                                                                                                                                                                                                                                                                                                                                                                                                                                                                                               | Disease      | 419,744           |
| 2                                                    | 'human immunodeficiency virus'/exp OR 'human immunodeficiency virus' OR 'human immunodeficiency virus' OR (human NEXT/5 (immun* OR immunodeficiency OR immunodeficiency OR virus OR infection*)) OR ('human immun*' AND 'deficiency virus')                                                                                                                                                                                                                                                                                                                                                                                                                                                                                                                                                                                                                                                                                                                                                                                                                            |              | 691,876           |
| 3                                                    | 'hiv':ab,ti OR 'hiv-1':ab,ti OR 'hiv 1':ab,ti OR 'hiv-2':ab,ti OR 'hiv 2':ab,ti OR 'hiv1':ab,ti OR 'hiv2':ab,ti OR 'hiv-i':ab,ti OR 'hiv-ii':ab,ti OR 'hiv infection' OR 'hiv-infection' OR 'hiv infect*' OR ('hiv':ab,ti AND infect*)                                                                                                                                                                                                                                                                                                                                                                                                                                                                                                                                                                                                                                                                                                                                                                                                                                 |              | 442,502           |
| 4                                                    | 'acquired immune deficiency syndrome'/exp                                                                                                                                                                                                                                                                                                                                                                                                                                                                                                                                                                                                                                                                                                                                                                                                                                                                                                                                                                                                                              |              | 152,503           |
| 5                                                    | 'aids':ab,ti OR ('acquired immun*' AND 'deficiency virus') OR (acquir* NEXT/5 (immun* OR immunodeficiency OR immunodeficiency OR virus OR infection*))                                                                                                                                                                                                                                                                                                                                                                                                                                                                                                                                                                                                                                                                                                                                                                                                                                                                                                                 |              | 298,917           |
| 6                                                    | #1 OR #2 OR #3 OR #4 OR #5                                                                                                                                                                                                                                                                                                                                                                                                                                                                                                                                                                                                                                                                                                                                                                                                                                                                                                                                                                                                                                             |              | 896,219           |
| 7                                                    | 'cohort analysis'/exp OR 'longitudinal study'/exp OR 'prospective study'/exp OR 'follow up'/exp OR 'major clinical study'/exp OR 'clinical article'/exp OR 'intervention study'/exp OR cohort*:ab,ti OR (((follow up' OR followup) NEXT/1 (study OR studies)):ab,ti) OR 'retrospective study'/exp OR 'case control study'/exp OR ((case* NEXT/1 control*):ab,ti) OR 'register'/de OR regist*:ab,ti OR 'data base'/de OR database:ab,ti OR 'data base':ab,ti OR (('real world' NEXT/1 (evidence OR data OR study OR studies)):ab,ti) OR 'health care record':ab,ti OR 'healthcare record':ab,ti OR 'health care records':ab,ti OR 'healthcare records':ab,ti OR 'medical record':ab,ti OR 'medical records':ab,ti OR questionnaire OR survey* OR ((medical OR insurance) AND (claims OR claim OR 'claims database' OR 'claim database')) OR 'pragmatic clinical trial' OR 'pragmatic trials' OR ((prospective OR retrospective) NEAR/5 (observation* OR study)) OR 'case study'/exp OR 'case series' OR 'large case series' OR (case NEAR/2 (stud* OR series OR large)) | Study design | 12,061,091        |
| 8                                                    | 'dolutegravir'/syn OR 'dolutegravir sodium' OR 'dolutegravir sodium monohydrate' OR 'gsk 1349572' OR 'gsk 1349572a' OR 'gsk 572' OR 'gsk1349572' OR 'gsk1349572a' OR 'gsk572' OR 's 1349572' OR 's 349572' OR 's gsk 1349572' OR 's gsk1349572' OR 's-349572' OR 's1349572' OR                                                                                                                                                                                                                                                                                                                                                                                                                                                                                                                                                                                                                                                                                                                                                                                         | Intervention | 25,108            |

|    |                                                                                              |             |      |
|----|----------------------------------------------------------------------------------------------|-------------|------|
|    | 's349572' OR 'tivicay' OR 'dtg':ab,ti OR 'juluca' OR 'triumeq' OR 'str':ab,ti                |             |      |
| 9  | #6 AND #7 AND #8                                                                             | Combination | 3487 |
| 10 | #9 AND ([editorial]/lim OR [letter]/lim OR [note]/lim OR [review]/lim OR [short survey]/lim) | Limits      | 338  |
| 11 | #9 AND [animals]/lim NOT ([humans]/lim AND [animals]/lim)                                    |             | 19   |
| 12 | #10 OR #11                                                                                   |             | 357  |
| 13 | #9 NOT #12                                                                                   |             | 3130 |
| 14 | 13 AND [2013-2022]/py                                                                        | Final hits  | 3055 |

#### Cochrane database search criteria

| Number | Query                                                                                                                                                                                                                                                                                                                                   | Facet        | Results, n |
|--------|-----------------------------------------------------------------------------------------------------------------------------------------------------------------------------------------------------------------------------------------------------------------------------------------------------------------------------------------|--------------|------------|
| 1      | MeSH descriptor: [HIV] explode all trees                                                                                                                                                                                                                                                                                                | Disease      | 3275       |
| 2      | MeSH descriptor: [HIV Infections] explode all trees                                                                                                                                                                                                                                                                                     |              | 13,711     |
| 3      | hiv:ab,ti or "hiv-1":ab,ti or "hiv 1":ab,ti or "hiv-2":ab,ti or "hiv 2":ab,ti or hiv1:ab,ti or hiv2:ab,ti or "hiv-i":ab,ti or "hiv-ii":ab,ti or "hiv infection" or "hiv-infection" or "hiv infect*" or (hiv:ab,ti and infect*)                                                                                                          |              | 27,987     |
| 4      | MeSH descriptor: [Acquired Immunodeficiency Syndrome] explode all trees                                                                                                                                                                                                                                                                 |              | 2054       |
| 5      | aids:ab,ti or ("acquired immun*" and "deficiency virus") or (acquir* next/5 (immun* or immunodeficiency or immunodeficiency or virus or infection*))                                                                                                                                                                                    |              | 14,176     |
| 6      | #1 or #2 or #3 or #4 or #5                                                                                                                                                                                                                                                                                                              |              | 36,201     |
| 7      | dolutegravir or "dolutegravir sodium" or "dolutegravir sodium monohydrate" or "gsk 1349572" or "gsk 1349572a" or "gsk 572" or "gsk1349572" or "gsk1349572a" or gsk572 or "s 1349572" or "s 349572" or "s gsk 1349572" or "s gsk1349572" or "s-349572" or s1349572 or s349572' or tivicay or dtg:ab,ti or juluca or triumeq or str:ab,ti | Intervention | 1362       |
| 8      | #6 and #7                                                                                                                                                                                                                                                                                                                               | Combination  | 801        |
| 9      | #8 (Publication Year from Jan 2013 to Oct 2022)                                                                                                                                                                                                                                                                                         | Final hits   | 774        |

#### MEDLINE® In-Process searched via PubMed® platform

| Number | Query                                                                                                                                                                                                                                                                                                                                         | Facet   | Results, n |
|--------|-----------------------------------------------------------------------------------------------------------------------------------------------------------------------------------------------------------------------------------------------------------------------------------------------------------------------------------------------|---------|------------|
| 1      | Search HIV                                                                                                                                                                                                                                                                                                                                    | Disease | 402,237    |
| 2      | Search (hiv[Title/Abstract] OR "hiv-1"[Title/Abstract] OR "hiv 1"[Title/Abstract] OR "hiv-2"[Title/Abstract] OR "hiv 2"[Title/Abstract] OR hiv1[Title/Abstract] OR "hiv2"[Title/Abstract] OR "hiv-i"[Title/Abstract] OR "hiv-ii"[Title/Abstract] OR "hiv infection" OR "hiv-infection" OR (hiv infect*) OR (hiv[Title/Abstract] AND infect*)) |         | 384,739    |
| 3      | Search (("human immunodeficiency virus infection" OR "human immunodeficiency virus" OR "human immunodeficiency virus" OR ((human immun*) AND "deficiency virus")))                                                                                                                                                                            |         | 106,504    |
| 4      | Search "acquired immune deficiency syndrome"                                                                                                                                                                                                                                                                                                  |         | 6301       |

|   |                                                                                                          |              |         |
|---|----------------------------------------------------------------------------------------------------------|--------------|---------|
| 5 | Search (aids[Title/Abstract] OR ((acquired immun* AND (deficiency AND (virus OR infect*))))              |              | 166,474 |
| 6 | Search (#1 OR #2 OR #3 OR #4 OR #5)                                                                      |              | 489,208 |
| 7 | Search (Dolutegravir OR "dolutegravir sodium" OR "gsk 1349572" OR "gsk1349572" OR "tivicay" OR "trumeq") | Intervention | 1735    |
| 8 | Search (#6 AND #7 (inprocess[sb] OR pubstatusaheadofprint))                                              | Combination  | 70      |
| 9 | Search (#8 (Publication Year from Jan 2013 to Oct 2022))                                                 | Final hits   | 70      |

**Supplementary Table 2.** Summary of Targeted Literature Search Strategy Criteria**Embase® and MEDLINE® database search criteria**

| <b>Number</b> | <b>Query</b>                                                                                                                                                                                                                                                                                                                                                                                                                                                                                                                                                                            | <b>Facet</b> | <b>Results, n</b> |
|---------------|-----------------------------------------------------------------------------------------------------------------------------------------------------------------------------------------------------------------------------------------------------------------------------------------------------------------------------------------------------------------------------------------------------------------------------------------------------------------------------------------------------------------------------------------------------------------------------------------|--------------|-------------------|
| 1             | 'human immunodeficiency virus infection'/exp OR 'human immunodeficiency virus infection'                                                                                                                                                                                                                                                                                                                                                                                                                                                                                                | Disease      | 414,164           |
| 2             | 'human immunodeficiency virus'/exp OR 'human immunodeficiency virus' OR 'human immunodeficiency virus' OR (human NEXT/5 (immun* OR immunodeficiency OR immunodeficiency OR virus OR infection*)) OR ('human immun*' AND 'deficiency virus')                                                                                                                                                                                                                                                                                                                                             |              | 679,290           |
| 3             | 'hiv':ab,ti OR 'hiv-1':ab,ti OR 'hiv 1':ab,ti OR 'hiv-2':ab,ti OR 'hiv 2':ab,ti OR 'hiv1':ab,ti OR 'hiv2':ab,ti OR 'hiv-i':ab,ti OR 'hiv-ii':ab,ti OR 'hiv infection' OR 'hiv-infection' OR 'hiv infect*' OR ('hiv':ab,ti AND infect*)                                                                                                                                                                                                                                                                                                                                                  |              | 435,271           |
| 4             | 'acquired immune deficiency syndrome'/exp                                                                                                                                                                                                                                                                                                                                                                                                                                                                                                                                               |              | 151,240           |
| 5             | 'aids':ab,ti OR ('acquired immun*' AND 'deficiency virus') OR (acquir* NEXT/5 (immun* OR immunodeficiency OR immunodeficiency OR virus OR infection*))                                                                                                                                                                                                                                                                                                                                                                                                                                  |              | 294,721           |
| 6             | #1 OR #2 OR #3 OR #4 OR #5                                                                                                                                                                                                                                                                                                                                                                                                                                                                                                                                                              |              | 880,095           |
| 7             | ('clinical trial'/exp OR 'randomized controlled trial'/exp OR 'controlled clinical trial'/exp OR 'multicenter study'/exp OR 'phase 3 clinical trial'/exp OR 'phase 4 clinical trial'/exp OR 'randomization'/exp OR 'single blind procedure'/exp OR 'double blind procedure'/exp OR 'crossover procedure'/exp OR 'placebo'/exp OR 'randomi?ed controlled trial\$:ti,ab OR rct:ti,ab OR random\$ NEAR/2 allocat\$ OR (single AND blind\$:ti,ab) OR (double AND blind\$:ti,ab) OR (treble OR triple) NEAR/2 blind\$ OR placebo\$:ti,ab OR 'prospective study':ti,ab OR 'open label':ti,ab) | Study design | 2,387,353         |
| 8             | 'dolutegravir'/syn OR 'dolutegravir sodium' OR 'dolutegravir sodium monohydrate' OR 'gsk 1349572' OR 'gsk 1349572a' OR 'gsk 572' OR 'gsk1349572' OR 'gsk1349572a' OR 'gsk572' OR 's 1349572' OR 's 349572' OR 's gsk 1349572' OR 's gsk1349572' OR 's-349572' OR 's1349572' OR 's349572' OR 'tivicay' OR 'dtg':ab,ti OR 'juluca' OR 'trumeq' OR 'str':ab,ti                                                                                                                                                                                                                             | Intervention | 24,296            |
| 9             | #6 AND #7 AND #8                                                                                                                                                                                                                                                                                                                                                                                                                                                                                                                                                                        | Combination  | 1121              |
| 10            | #9 AND ([editorial]/lim OR [letter]/lim OR [note]/lim OR [review]/lim OR [short survey]/lim)                                                                                                                                                                                                                                                                                                                                                                                                                                                                                            | Limits       | 75                |
| 11            | #9 AND [animals]/lim NOT ([humans]/lim AND [animals]/lim)                                                                                                                                                                                                                                                                                                                                                                                                                                                                                                                               |              | 10                |
| 12            | #10 OR #11                                                                                                                                                                                                                                                                                                                                                                                                                                                                                                                                                                              |              | 85                |
| 13            | #9 NOT #12                                                                                                                                                                                                                                                                                                                                                                                                                                                                                                                                                                              |              | 1036              |

14 #13 AND [2013-2022]/py Final hits 988

| <b>Cochrane database search criteria</b> |                                                                                                                                                                                                                                                                                                                                         |              |                   |
|------------------------------------------|-----------------------------------------------------------------------------------------------------------------------------------------------------------------------------------------------------------------------------------------------------------------------------------------------------------------------------------------|--------------|-------------------|
| <b>Number</b>                            | <b>Query</b>                                                                                                                                                                                                                                                                                                                            | <b>Facet</b> | <b>Results, n</b> |
| 1                                        | MeSH descriptor: [HIV] explode all trees                                                                                                                                                                                                                                                                                                | Disease      | 3264              |
| 2                                        | MeSH descriptor: [HIV Infections] explode all trees                                                                                                                                                                                                                                                                                     |              | 13,582            |
| 3                                        | hiv:ab,ti or "hiv-1":ab,ti or "hiv 1":ab,ti or "hiv-2":ab,ti or "hiv 2":ab,ti or hiv1:ab,ti or hiv2:ab,ti or "hiv-i":ab,ti or "hiv-ii":ab,ti or "hiv infection" or "hiv-infection" or "hiv infect*" or (hiv:ab,ti and infect*)                                                                                                          |              | 27,358            |
| 4                                        | MeSH descriptor: [Acquired Immunodeficiency Syndrome] explode all trees                                                                                                                                                                                                                                                                 |              | 2037              |
| 5                                        | aids:ab,ti or ("acquired immun*" and "deficiency virus") or (acquir* next/5 (immun* or immunodeficiency or immunodeficiency or virus or infection*))                                                                                                                                                                                    |              | 13,837            |
| 6                                        | #1 or #2 or #3 or #4 or #5                                                                                                                                                                                                                                                                                                              |              | 35,344            |
| 7                                        | dolutegravir or "dolutegravir sodium" or "dolutegravir sodium monohydrate" or "gsk 1349572" or "gsk 1349572a" or "gsk 572" or "gsk1349572" or "gsk1349572a" or gsk572 or "s 1349572" or "s 349572" or "s gsk 1349572" or "s gsk1349572" or "s-349572" or s1349572 or s349572' or tivicay or dtg:ab,ti or juluca or triumeq or str:ab,ti | Intervention | 1298              |
| 8                                        | #6 and #7                                                                                                                                                                                                                                                                                                                               | Combination  | 759               |
| 9                                        | #8 (Publication Year from 2013 to 2017)                                                                                                                                                                                                                                                                                                 | Final hits   | 163               |

| <b>MEDLINE® In-Process searched via PubMed® platform</b> |                                                                                                                                                                                                                                                                                                                                               |              |                   |
|----------------------------------------------------------|-----------------------------------------------------------------------------------------------------------------------------------------------------------------------------------------------------------------------------------------------------------------------------------------------------------------------------------------------|--------------|-------------------|
| <b>Number</b>                                            | <b>Query</b>                                                                                                                                                                                                                                                                                                                                  | <b>Facet</b> | <b>Results, n</b> |
| 1                                                        | Search HIV                                                                                                                                                                                                                                                                                                                                    | Disease      | 396,836           |
| 2                                                        | Search (hiv[Title/Abstract] OR "hiv-1"[Title/Abstract] OR "hiv 1"[Title/Abstract] OR "hiv-2"[Title/Abstract] OR "hiv 2"[Title/Abstract] OR hiv1[Title/Abstract] OR "hiv2"[Title/Abstract] OR "hiv-i"[Title/Abstract] OR "hiv-ii"[Title/Abstract] OR "hiv infection" OR "hiv-infection" OR (hiv infect*) OR (hiv[Title/Abstract] AND infect*)) |              | 379,510           |
| 3                                                        | Search (("human immunodeficiency virus infection" OR "human immunodeficiency virus" OR "human immunodeficiency virus" OR ((human immun*) AND "deficiency virus")))                                                                                                                                                                            |              | 105,376           |
| 4                                                        | Search "acquired immune deficiency syndrome"                                                                                                                                                                                                                                                                                                  |              | 6253              |
| 5                                                        | Search (aids[Title/Abstract] OR ((acquired immun*) AND (deficiency AND (virus OR infect*))))                                                                                                                                                                                                                                                  |              | 164,545           |
| 6                                                        | Search (#1 OR #2 OR #3 OR #4 OR #5)                                                                                                                                                                                                                                                                                                           |              | 482,674           |
| 7                                                        | Search (Dolutegravir OR "dolutegravir sodium" OR "gsk 1349572" OR "gsk1349572" OR "tivicay" OR "trumeq")                                                                                                                                                                                                                                      | Intervention | 1639              |
| 8                                                        | Search (#6 AND #7 (inprocess[sb] OR pubstatusaheadofprint))                                                                                                                                                                                                                                                                                   | Combination  | 45                |
| 9                                                        | Search (#8 (Publication Year from 2013 to 2022))                                                                                                                                                                                                                                                                                              | Final hits   | 45                |

**Supplementary Table 3.** Meta-analysis Logit-Transformed Estimated Proportions of PWH With Historical M184V/I to Experience VF From Interventional Studies, Inclusive of All VF Definitions

| <b>Week 24</b> |                     |                            |                                    |                                                    |                             |                      |
|----------------|---------------------|----------------------------|------------------------------------|----------------------------------------------------|-----------------------------|----------------------|
| <b>Study</b>   | <b>VF events, n</b> | <b>PWH with M184V/I, n</b> | <b>Proportion with VF (95% CI)</b> | <b>Total estimated proportion with VF (95% CI)</b> |                             | <b>Heterogeneity</b> |
|                |                     |                            |                                    | <b>Common-effects model</b>                        | <b>Random-effects model</b> |                      |
| DOLULAM        | 0                   | 17                         | 0.00 (0.00-0.20)                   | 0.00 (0.00-1.00)                                   | 0.00 (0.00-1.00)            | $I^2 = 0\%$          |
| TANGO          | 0                   | 4                          | 0.00 (0.00-0.60)                   |                                                    |                             | $\tau^2 = 0$         |
| ART PRO        | 0                   | 21                         | 0.00 (0.00-0.16)                   |                                                    |                             | $P=1.00$             |
| <b>Week 48</b> |                     |                            |                                    |                                                    |                             |                      |
| <b>Study</b>   | <b>VF events, n</b> | <b>PWH with M184V/I, n</b> | <b>Proportion with VF (95% CI)</b> | <b>Total estimated proportion with VF (95% CI)</b> |                             | <b>Heterogeneity</b> |
|                |                     |                            |                                    | <b>Common-effects model</b>                        | <b>Random-effects model</b> |                      |
| DOLULAM        | 0                   | 17                         | 0.00 (0.00-0.20)                   | 0.00 (0.00-1.00)                                   | 0.00 (0.00-1.00)            | $I^2 = 0\%$          |
| TANGO          | 0                   | 4                          | 0.00 (0.00-0.60)                   |                                                    |                             | $\tau^2 = 0$         |
| ART PRO        | 0                   | 21                         | 0.00 (0.00-0.16)                   |                                                    |                             | $P=1.00$             |
| SALSA          | 0                   | 5                          | 0.00 (0.00-0.52)                   |                                                    |                             |                      |
| SOLAR 3D       | 0                   | 50                         | 0.00 (0.00-0.07)                   |                                                    |                             |                      |
| <b>Week 96</b> |                     |                            |                                    |                                                    |                             |                      |
| <b>Study</b>   | <b>VF events, n</b> | <b>PWH with M184V/I, n</b> | <b>Proportion with VF (95% CI)</b> | <b>Total estimated proportion with VF (95% CI)</b> |                             | <b>Heterogeneity</b> |
|                |                     |                            |                                    | <b>Common-effects model</b>                        | <b>Random-effects model</b> |                      |
| DOLULAM        | 0                   | 17                         | 0.00 (0.00-0.20)                   | 0.00 (0.00-1.00)                                   | 0.00 (0.00-1.00)            | $I^2 = 0\%$          |
|                |                     |                            |                                    |                                                    |                             | $\tau^2 = 0$         |
| ART PRO        | 0                   | 21                         | 0.00 (0.00-0.16)                   |                                                    |                             | $P=1.00$             |

PWH, people with HIV-1; VF, virologic failure.



**Supplementary Table 4.** Meta-analysis Freeman-Tukey Double-Arcsine–Transformed Estimated Proportions of PWH With Historical M184V/I to Experience VF From Interventional Studies, Inclusive of All VF Definitions

| <b>Week 24</b> |                         |                                |                                        |                                                        |                                 |                      |
|----------------|-------------------------|--------------------------------|----------------------------------------|--------------------------------------------------------|---------------------------------|----------------------|
| <b>Study</b>   | <b>VF events,<br/>n</b> | <b>PWH with<br/>M184V/I, n</b> | <b>Proportion with VF<br/>(95% CI)</b> | <b>Total estimated proportion<br/>with VF (95% CI)</b> |                                 | <b>Heterogeneity</b> |
|                |                         |                                |                                        | <b>Common-effects<br/>model</b>                        | <b>Random-effects<br/>model</b> |                      |
| DOLULAM        | 0                       | 17                             | 0.00 (0.00-0.20)                       | 0.00 (0.00-0.03)                                       | 0.00 (0.00-0.03)                | $I^2 = 0\%$          |
| TANGO          | 0                       | 4                              | 0.00 (0.00-0.60)                       |                                                        |                                 | $\tau^2 = 0$         |
| ART PRO        | 0                       | 21                             | 0.00 (0.00-0.16)                       |                                                        |                                 | $P=0.89$             |
| <b>Week 48</b> |                         |                                |                                        |                                                        |                                 |                      |
| <b>Study</b>   | <b>VF events,<br/>n</b> | <b>PWH with<br/>M184V/I, n</b> | <b>Proportion with VF<br/>(95% CI)</b> | <b>Total estimated proportion<br/>with VF (95% CI)</b> |                                 | <b>Heterogeneity</b> |
|                |                         |                                |                                        | <b>Common-effects<br/>model</b>                        | <b>Random-effects<br/>model</b> |                      |
| DOLULAM        | 0                       | 17                             | 0.00 (0.00-0.20)                       | 0.00 (0.00-0.00)                                       | 0.00 (0.00-0.00)                | $I^2 = 0\%$          |
| TANGO          | 0                       | 4                              | 0.00 (0.00-0.60)                       |                                                        |                                 | $\tau^2 = 0$         |
| ART PRO        | 0                       | 21                             | 0.00 (0.00-0.16)                       |                                                        |                                 | $P=0.94$             |
| SALSA          | 0                       | 5                              | 0.00 (0.00-0.52)                       |                                                        |                                 |                      |
| SOLAR 3D       | 0                       | 50                             | 0.00 (0.00-0.07)                       |                                                        |                                 |                      |
| <b>Week 96</b> |                         |                                |                                        |                                                        |                                 |                      |
| <b>Study</b>   | <b>VF events,<br/>n</b> | <b>PWH with<br/>M184V/I, n</b> | <b>Proportion with VF<br/>(95% CI)</b> | <b>Total estimated proportion<br/>with VF (95% CI)</b> |                                 | <b>Heterogeneity</b> |
|                |                         |                                |                                        | <b>Common-effects<br/>model</b>                        | <b>Random-effects<br/>model</b> |                      |
| DOLULAM        | 0                       | 17                             | 0.00 (0.00-0.20)                       | 0.00 (0.00-0.05)                                       | 0.00 (0.00-0.05)                | $I^2 = 0\%$          |
| ART PRO        | 0                       | 21                             | 0.00 (0.00-0.16)                       |                                                        |                                 | $\tau^2 = 0$         |
|                |                         |                                |                                        |                                                        |                                 | $P=0.94$             |

PWH, people with HIV-1; VF, virologic failure.

**Supplementary Figure 1.** Meta-analysis estimates of VF from base analysis RWE studies in PWH (A) with and (B) without historical M184V/I after switch to DTG + 3TC, using arcsine-transformed proportions. DTG, dolutegravir; PWH, people with HIV-1; RWE, real-world evidence; 3TC, lamivudine; VF, virologic failure; Wt, weight.

**A PWH with M184V/I before switch**

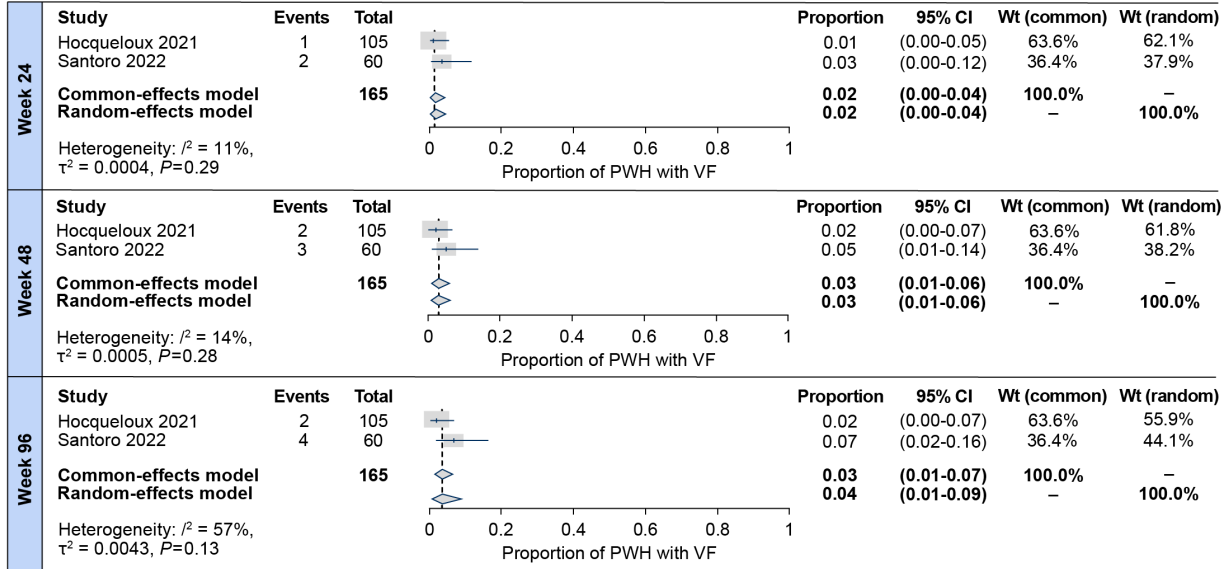

**B PWH without M184V/I before switch**

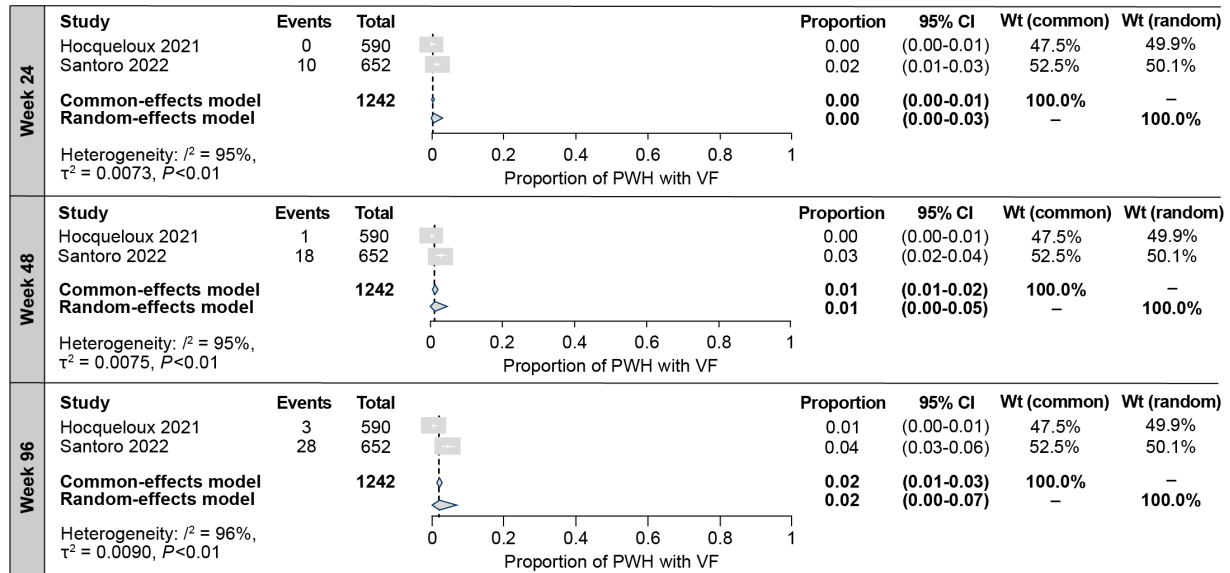

**Supplementary Figure 2.** Meta-analysis estimates of VF from sensitivity analysis RWE studies in PWH **(A)** with and **(B)** without historical M184V/I after switch to DTG + 3TC, using logit-transformed proportions. All studies reporting outcomes were included regardless of VF definition. DTG, dolutegravir; PWH, people with HIV-1; RWE, real-world evidence; 3TC, lamivudine; VF, virologic failure.

### A PWH with M184V/I before switch

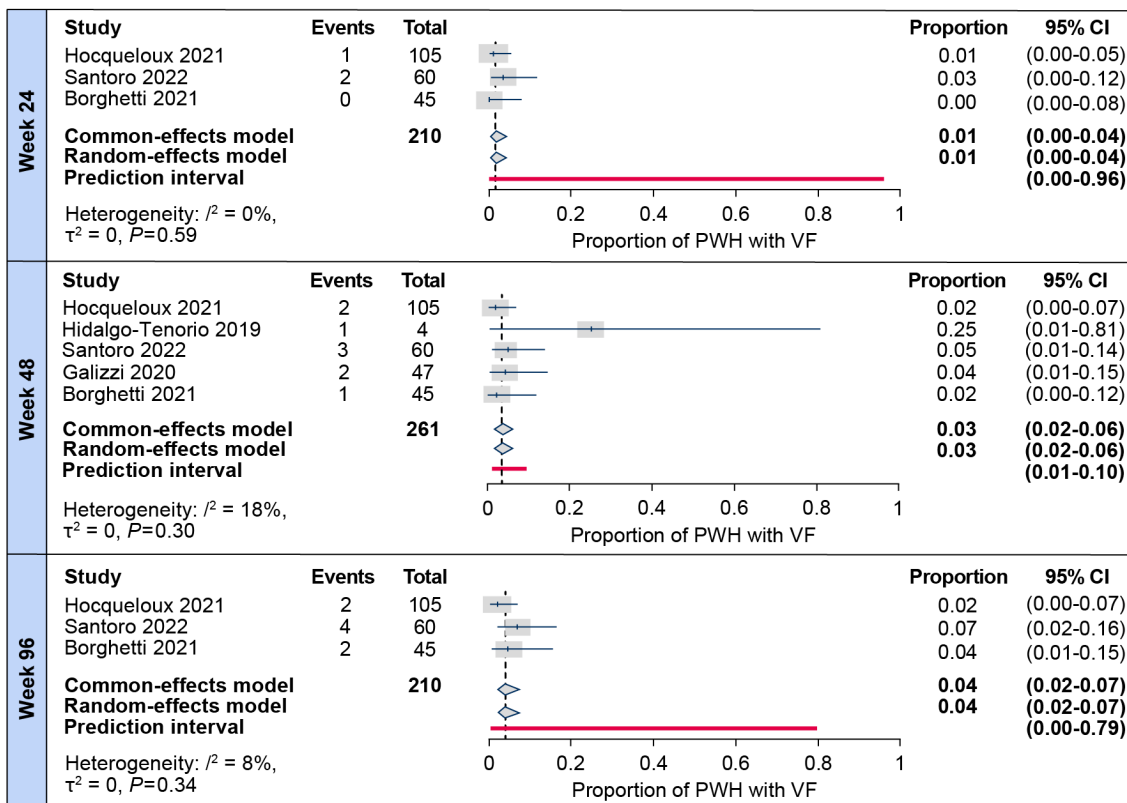

### B PWH without M184V/I before switch

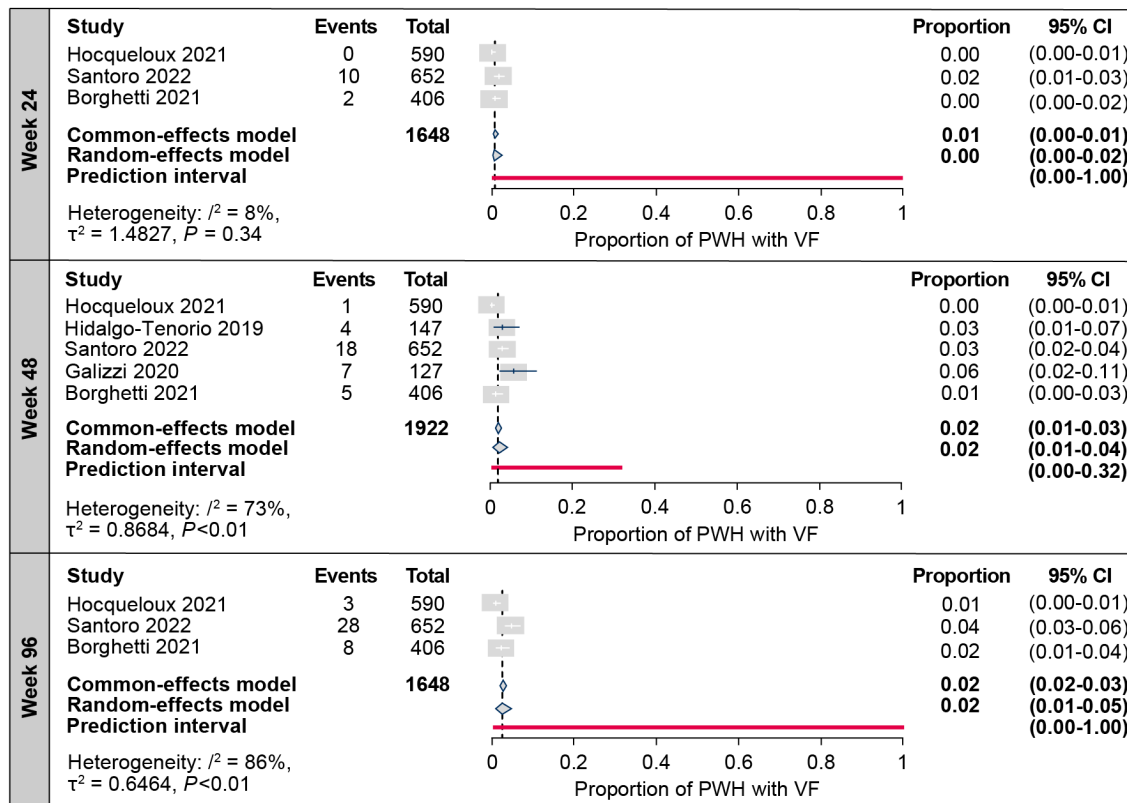

**Supplementary Figure 3.** Meta-analysis estimates of VF from sensitivity analysis RWE studies in PWH **(A)** with and **(B)** without historical M184V/I after switch to DTG + 3TC, using Freeman-Tukey double-arcsine-transformed proportions. All studies reporting outcomes were included regardless of VF definition. DTG, dolutegravir; PWH, people with HIV-1; RWE, real-world evidence; 3TC, lamivudine; VF, virologic failure; Wt, weight.

**A PWH with M184VI before switch**

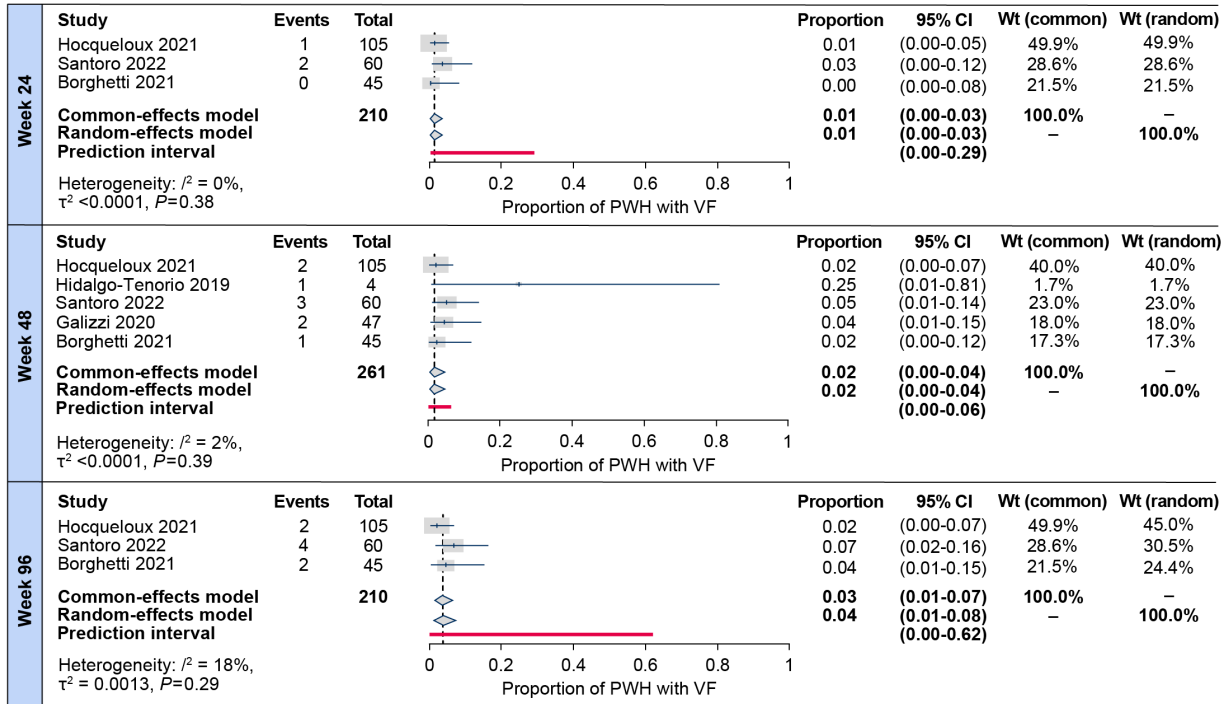

**B PWH without M184VI before switch**

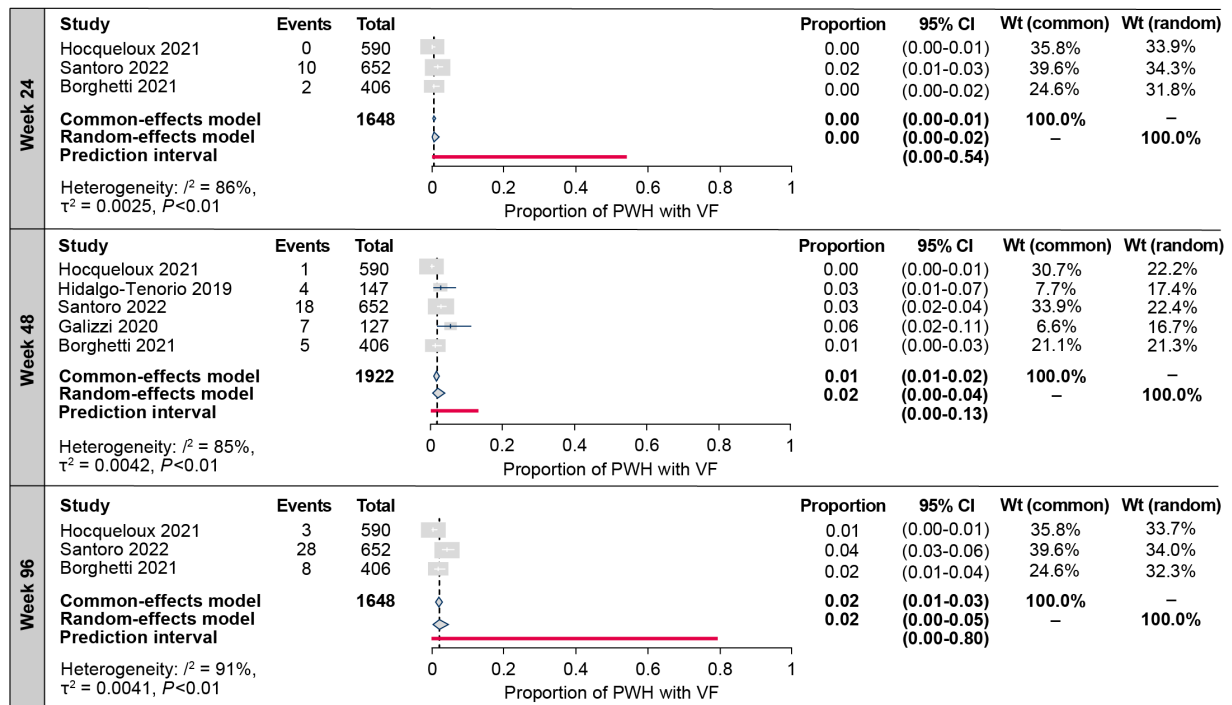

**Supplementary Figure 4.** Meta-analysis estimates of VF from base analysis interventional studies in PWH with historical M184V/I after switch to DTG + 3TC, using arcsine-transformed proportions. DTG, dolutegravir; PWH, people with HIV-1; 3TC, lamivudine; VF, virologic failure; Wt, weight. <sup>a</sup>The 2 studies reporting VF at Week 96 had different VF definitions.

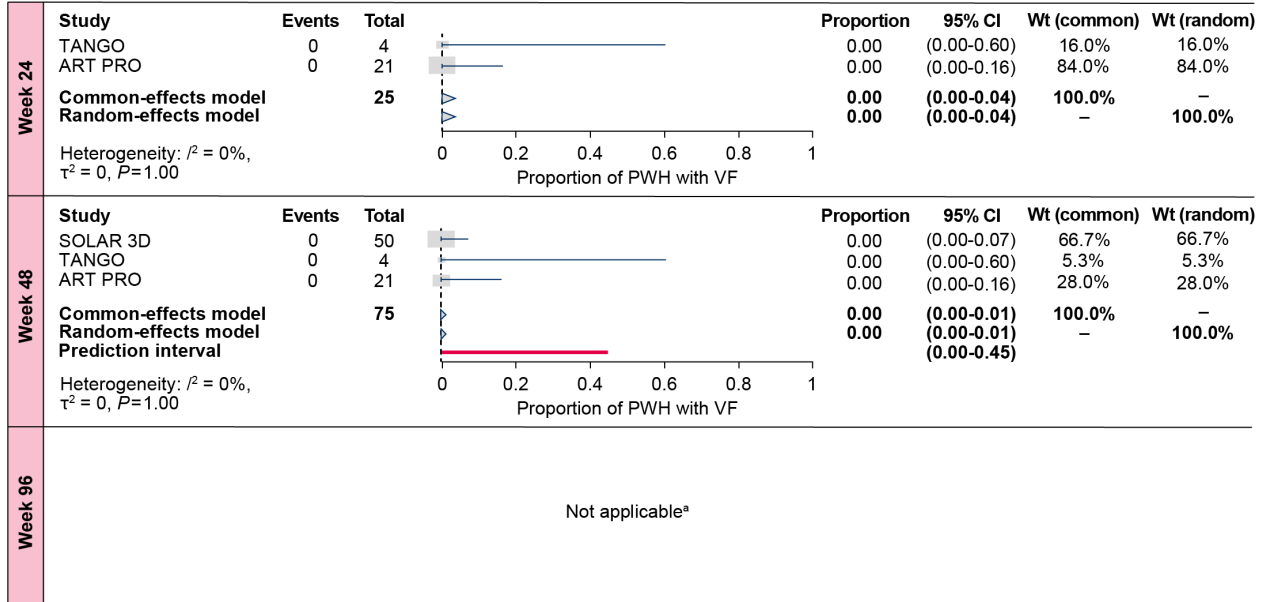

Supplement: ofad526_supplementary_data.pdf [file ofad526_supplementary_data.pdf]
